RESEARCH ARTICLE

# Separation of $^{103}\text{Ru}$ from a proton irradiated thorium matrix: A potential source of Auger therapy radionuclide $^{103\text{m}}\text{Rh}$

Tara Mastren<sup>1</sup>✉, Valery Radchenko<sup>1</sup>✉<sup>‡</sup>, Philip D. Hopkins<sup>1</sup>, Jonathan W. Engle<sup>1</sup><sup>‡</sup>, John W. Weidner<sup>1</sup>, Roy Copping<sup>2</sup>, Mark Brugh<sup>1</sup>, F. Meiring Nortier<sup>1</sup>, Eva R. Birnbaum<sup>1</sup>, Kevin D. John<sup>1</sup>, Michael Ernst-Heinrich Fassbender<sup>1</sup>\*

**1** Chemistry Division, Los Alamos National Laboratory, Los Alamos, New Mexico, United States of America, **2** Nuclear Security and Isotope Technology Division, Oak Ridge National Laboratory, Oak Ridge, Tennessee, United States of America

✉ These authors contributed equally to this work.

‡ Current address: TRIUMF, Vancouver, British Columbia, Canada

‡ Current address: University of Wisconsin, Madison, Wisconsin, United States of America

\* [mifa@lanl.gov](mailto:mifa@lanl.gov), [radiochemistry@outlook.com](mailto:radiochemistry@outlook.com)

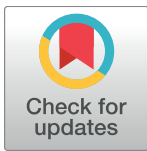

**OPEN ACCESS**

**Citation:** Mastren T, Radchenko V, Hopkins PD, Engle JW, Weidner JW, Copping R, et al. (2017) Separation of  $^{103}\text{Ru}$  from a proton irradiated thorium matrix: A potential source of Auger therapy radionuclide  $^{103\text{m}}\text{Rh}$ . PLoS ONE 12(12): e0190308. <https://doi.org/10.1371/journal.pone.0190308>

**Editor:** Bruno Merk, University of Liverpool, UNITED KINGDOM

**Received:** October 4, 2017

**Accepted:** December 12, 2017

**Published:** December 22, 2017

**Copyright:** This is an open access article, free of all copyright, and may be freely reproduced, distributed, transmitted, modified, built upon, or otherwise used by anyone for any lawful purpose. The work is made available under the [Creative Commons CC0](https://creativecommons.org/licenses/by/4.0/) public domain dedication.

**Data Availability Statement:** All relevant data are within the paper.

**Funding:** This work was supported by the United States Department of Energy, Office of Science, Isotope Development and Production for Research and Application subprogram within Office of Nuclear Physics and the LANL LDRD program (LDRD 20160439ER) for financial support. The funder had no role in study design, data collection and analysis, decision to publish, or preparation of the manuscript.

## Abstract

Ruthenium-103 is the parent isotope of  $^{103\text{m}}\text{Rh}$  ( $t_{1/2}$  56.1 min), an isotope of interest for Auger electron therapy. During the proton irradiation of thorium targets, large amounts of  $^{103}\text{Ru}$  are generated through proton induced fission. The development of a two part chemical separation process to isolate  $^{103}\text{Ru}$  in high yield and purity from a proton irradiated thorium matrix on an analytical scale is described herein. The first part employed an anion exchange column to remove cationic actinide/lanthanide impurities along with the majority of the transition metal fission products. Secondly, an extraction chromatographic column utilizing diglycolamide functional groups was used to decontaminate  $^{103}\text{Ru}$  from the remaining impurities. This method resulted in a final radiochemical yield of  $83 \pm 5\%$  of  $^{103}\text{Ru}$  with a purity of 99.9%. Additionally, measured nuclear reaction cross sections for the formation of  $^{103}\text{Ru}$  and  $^{106}\text{Ru}$  via the  $^{232}\text{Th}(p,f)^{103,106}\text{Ru}$  reactions are reported within.

## Introduction

Rhodium-103m ( $t_{1/2}$  56.12 m) is an isotope of interest for targeted radiotherapy that decays via isomeric transition to stable  $^{103}\text{Rh}$ . This decay gives rise to the emission of low-energy Auger/Coster-Kronig electrons (2.3 electrons/decay) [1], which have the potential to induce double stranded DNA damage promoting cancer cell death. Rh-103m was identified by Bernhardt et al. as one of five radionuclides of interest for auger therapy that would deliver a sufficiently high dose to the tumor with minimal dose to surrounding tissue as the energy of the emitted electrons are lower than 40 keV and the half-life is sufficient for targeting [2].

The use of Auger/Coster-Kronig electrons for targeted radiotherapy is an emerging field of nuclear medicine [3, 4]. The linear energy transfer (LET) in biological tissue by these low-energy electrons is high due to the short path length (nm scale). High LET, i.e. energy release,

**Competing interests:** Michael E Fassbender is an academic editor of PLoS ONE, however, a different academic editor has been selected to handle this paper to whom Fassbender has no relationship. This does not alter our adherence to PLOS ONE policies on sharing data and materials.

provided within a short range is ideal for targeted radiotherapy, which potentially kills the cancer or diseased cells in the vicinity of the decay and provides less damage to surrounding healthy tissue. Due to the short ranges of auger electrons it is important that the targeting agent is internalized by the cell to where it can do the most damage [5].

The pathway to the production of  $^{103\text{m}}\text{Rh}$  leads via formation of its parent radionuclides  $^{103}\text{Pd}$  ( $t_{1/2}$  16.99 d) and  $^{103}\text{Ru}$  ( $t_{1/2}$  39.21 d). Production of the parent isotopes permit the use of a generator system to supply  $^{103\text{m}}\text{Rh}$  [6–9]. Production of  $^{103}\text{Pd}$  using proton or deuteron induced reactions on  $^{103\text{g}}\text{Rh}$  (stable) via  $^{103\text{g}}\text{Rh}(p,n)^{103}\text{Pd}$  and  $^{103\text{g}}\text{Rh}(d,2n)^{103}\text{Pd}$  has been investigated [10–12]. Other production routes include the neutron irradiation of  $^{102}\text{Ru}$  (stable) to produce  $^{103}\text{Ru}$  as well as the isolation of  $^{103}\text{Ru}$  from fission products of  $^{235}\text{U}$  through the following reactions:  $^{102}\text{Ru}(n,\gamma)^{103}\text{Ru}$  and  $^{235}\text{U}(n,f)^{103}\text{Ru}$  [6, 7].

Currently, Los Alamos National Laboratory (LANL), Oak Ridge National Laboratory (ORNL), and Brookhaven National Laboratory (BNL) are investigating the bulk production of  $^{225}\text{Ac}$  ( $t_{1/2}$  9.92 d), another isotope of interest for therapeutic applications, by proton irradiations of thorium targets [13, 14]. During this process many additional isotopes of interest are generated, including fission products like  $^{103}\text{Ru}$ . Methods are being investigated to leverage these irradiations to recover additional radionuclides of interest to nuclear medicine without a negative impact on the  $^{225}\text{Ac}$  recovery process.

The simultaneous separation of  $^{103}\text{Ru}$  and  $^{225}\text{Ac}$  from bulk thorium and fission products has three main challenges: 1) the separation of  $^{103}\text{Ru}$  from a mixture containing bulk thorium and many additional fission products, 2) minimization of impacts to the  $^{225}\text{Ac}$  purification process, and 3) management of the multiple oxidation states of  $^{103}\text{Ru}$ . In this work, we introduce an anion exchange method that has been developed to address these challenges. It has been successfully used to isolate  $^{103}\text{Ru}$  in high yield.

Nuclear excitation functions, i.e., nuclear reaction cross sections as a function of proton energy, reflect the probability at which a desired nuclear reaction occurs. Carefully measured excitation functions provide the radionuclide production scientist with an invaluable tool to estimate both product yield and expected levels of unwanted byproducts. Target thicknesses, particle energies and separation chemistry design are developed according to excitation function based estimates. Hence, to provide a link between the analytical data of this work and the application to radionuclide production science, the excitation functions for the proton induced formation of  $^{103}\text{Ru}$  and  $^{106}\text{Ru}$  through the reactions  $^{232}\text{Th}(p,f)^{103}\text{Ru}$  and  $^{232}\text{Th}(p,f)^{106}\text{Ru}$ , respectively, are reported as well at incident energies below 200 MeV. Excitation functions were calculated by the analysis of data collected from previous thin foil activation experiments [15] conducted at the Los Alamos Neutron Science Center's 100 MeV and 200 MeV proton beams. These energy differential cross sections were used to obtain predicted thick target yields of up to 111 GBq (3 Ci) for 100 g thorium targets (thickness 8.6 mm) after exposure to 49.9 mAh of integrated proton beam current, the projected fluence to which thorium targets will be exposed for  $^{225}\text{Ac}$  production at the Isotope Production Facility (IPF) at LANL.

## Materials and methods

### Materials

All reagents used were trace metal grade unless specified elsewhere. Aqueous solutions were prepared with 18 M $\Omega$  water (Millipore) on site. AG1-X8 resin was obtained from Biorad (Hercules, CA, USA) and DGA resin (N,N,N',N'-tetra-n-octyldiglycolamide) was obtained from Eichrom (Lisle, IL, USA). For nuclear reaction cross section measurements, natural thorium foils of 99.7% purity were obtained from Goodfellow Corporation (Oakdale, PA, USA). The foils were approximately 2.5  $\times$  2.5 mm, with thicknesses of 60.5–70.5 mg/cm<sup>2</sup>. [15] Aluminum

foils of 99.9% purity and similar dimensions with  $65 \text{ mg/cm}^2$  thickness were added to the target foil stack as beam monitors using the  $^{27}\text{Al}(p,x)^{22}\text{Na}$  nuclear reaction and the excitation functions reported by Steyn et al. [16]. Foils were enclosed in a single layer of adhesive-backed  $25 \mu\text{m}$  thick Kapton tape. Thorium metal targets were manufactured at Los Alamos National Laboratory (LANL). For larger-scale experiments, small pieces of thorium metal (purity  $>99\%$  as determined via X-ray fluorescence spectroscopy) were obtained from LANL's internal inventory. The raw material was arc melted and rolled into sheets with a mean thickness of  $0.50 \pm 0.02 \text{ mm}$  for the use as proton beam targets. All separation studies reported within were performed in triplicate.

## High Purity Germanium (HPGe) detector analysis

**Cross section measurements.** Proton induced fission cross sections for the production of  $^{103}\text{Ru}$  ( $t_{1/2}$  39.21 d) and  $^{106}\text{Ru}$  (1.017 a) were extracted from previous work utilizing nondestructive  $\gamma$ -ray spectroscopy the activity of each residual radionuclide of interest after several hours' delay to allow short-lived radionuclides to decay [15, 17]. The thorium foils were counted on an ORTEC GEM10P4-70 detector with a relative efficiency of 10%, while the aluminum foils were counted on a Princeton Gamma-tech lithium-drifted germanium Ge(Li) detector with a relative efficiency of 13.7%. Both detectors were well shielded and calibrated using National Institute of Standards and Technology (NIST)-traceable gamma calibration sources. The thorium foils were counted more than 35 times over a period of several months, and the decay curves of all isotopes of interest were closely followed to ensure proper identification and to evaluate any possible interferences. Ruthenium-106 decay is not accompanied by a  $\gamma$ -ray emission. Hence the 622 keV gamma from its daughter  $^{106}\text{Rh}$  (29.8 s) was used for cross section calculations as  $^{106}\text{Rh}$  is in secular equilibrium with  $^{106}\text{Ru}$ . The aluminum foils were counted approximately 12 times within the first week after end of bombardment (EOB) to monitor the  $^{24}\text{Na}$  decay curve, followed by a minimum of three 8 h counts several weeks later to quantify the  $^{22}\text{Na}$  activity at EOB. Uncertainties in linear regressions fitted parameters were computed from covariance matrices as the standard deviation in the activity extrapolated to the end of bombardment. This value was combined according to the Gaussian law of error propagation with estimated contributing uncertainties from detector calibration and geometry reproducibility (5.9% combined), target foil dimensions (0.1%), and proton flux (6%–18%). Multiple photopeaks were used (up to a maximum of 4) when possible, and so additional uncertainty as the standard deviation of these complementary measurements was combined with the uncertainties described above, again according to the Gaussian law of error propagation.

**Separation chemistry analysis.** Gamma-ray spectroscopy chemical separation experiments was conducted using an EG&G Ortec Model GMX-35200-S HPGe detector system in combination with a Canberra Model 35-Plus multichannel analyzer. Detector diameter was 50.0 mm, detector length was 53.5 mm, Be window thickness was 0.5 mm, and outer dead-layer thickness was  $0.3 \mu\text{m}$ . Detector response function determination and evaluation were performed using standards of radionuclide mixtures containing  $^{241}\text{Am}$ ,  $^{109}\text{Cd}$ ,  $^{57}\text{Co}$ ,  $^{139}\text{Ce}$ ,  $^{203}\text{Hg}$ ,  $^{113}\text{Sn}$ ,  $^{137}\text{Cs}$ ,  $^{88}\text{Y}$ , and  $^{60}\text{Co}$ , traceable to the NIST and supplied by Eckert & Ziegler (Atlanta, GA, USA). The detector was a p-type Al-windowed HPGe detector with a measured FWHM at 1333 keV of approximately 2.2 keV and a relative efficiency of about 10%. Relative total source activity uncertainties ranged from 2.6% to 3.3%. Counting dead times were kept below 10%.

## Cross section measurement irradiations

Thin thorium foils were irradiated in two separate experiments at the Los Alamos Neutron Science Center (LANSCE) at LANL using incident proton energies of 100 and 200 MeV as

described previously [15]. In each experiment, the original beam energy was degraded to approximately half of its original value using aluminum degraders. Beam current was monitored using thin aluminum foils and evaluated cross sections for the  $^{27}\text{Al}(p,x)^{22}\text{Na}$  reaction [https://www-nds.iaea.org/exfor/servlet/X4sSearch5]. The beam profile was assessed following the experiment by the activation of thin stainless steel plates whose dimensions significantly exceeded those used for the thorium foils. The steel plates were exposed to Gafchromic<sup>®</sup> film following the end of irradiation in order to map the beam profile, which was determined to have been quantitatively incident on the desired targets in both experiments.

### Production target irradiations

A 10 g thorium metal target was irradiated at the Isotope Production Facility (IPF), Los Alamos National Laboratory (LANL, NM, USA). The target was encapsulated in Inconel cladding and placed into the high energy “A” slot (nominal 92 MeV incident energy) of the IPF target assembly. IPF targetry and  $4\pi$  water cooling were identical to the design as described previously [18, 19]. The target was irradiated with 230  $\mu\text{A}$  of 89.6 MeV protons for 22.5 hours.

### Separation of $^{103}\text{Ru}$

The irradiated 10 g thorium target was shipped to Oak Ridge National Laboratory (ORNL) for recovery of  $^{225}\text{Ac}$ . The target was dissolved in 200 mL 10 M HCl and 0.1 mL of 2M HF with heating (80–90 °C) for approximately 2 hours. A 0.1 mL aliquot of the dissolved target was diluted to 5.1 mL with 0.1M HNO<sub>3</sub>. This solution was then used as a stock solution for radio-tracers that represent radionuclides previously identified in the target [13]. For the chemical separation studies, a spiked mock-up solution was prepared. Approximately 1 g of thorium metal was dissolved with 20 mL 10 M HCl spiked with 40  $\mu\text{L}$  2 M HF. A 50  $\mu\text{L}$  aliquot of the radiotracer stock solution, as prepared above, was then added to this solution and contacted with 10 g AG1-X8 resin in a plastic column (Biorad). The eluent was collected (fraction 1) and the column was washed with an additional 2 x 5 mL of 10 M HCl (fraction 2 & 3). The column was then washed with four 5 mL fractions of 1 M HCl (fractions 4–7). To elute the remaining  $^{103}\text{Ru}$ , eight 5 mL fractions of 10 M HNO<sub>3</sub> were added to the column and collected (fractions 8–15). All fractions were analyzed by HPGe spectroscopy using the characteristic  $\gamma$ -rays as identified in Table 1. Fractions 1–3 were brought to soft dryness and reconstituted in 205 mL 1 M citric acid solution, adjusted to pH 2 with HCl, and subjected to the  $^{225}\text{Ac}$  purification process as described previously [13, 14].

A second column was developed to remove contaminants from the  $^{103}\text{Ru}$  eluted in fractions 8–15. Contaminants present included  $^{95}\text{Zr}$ ,  $^{95}\text{Nb}$ ,  $^{233}\text{Pa}$ ,  $^{230}\text{Pa}$ ,  $^{117\text{m}}\text{Sn}$  and  $^{124,125}\text{Sb}$ . These fractions were brought to near dryness and reconstituted in 10 mL 10 M HCl. This solution was

**Table 1. Fission product nuclides identified in this study.**

| Radionuclide              | Half-life (d) | Identifying $\gamma$ -ray Emissions (keV) [% Intensity] |
|---------------------------|---------------|---------------------------------------------------------|
| $^{103}\text{Ru}$         | 39.27         | 497 [90.9]                                              |
| $^{95}\text{Nb}$          | 34.98         | 765 [100]                                               |
| $^{95}\text{Zr}$          | 64.02         | 724 [44.17] / 756 [54]                                  |
| $^{117\text{m}}\text{Sn}$ | 13.6          | 158.56 [86]                                             |
| $^{123\text{m}}\text{Te}$ | 119.7         | 158.97 [84]                                             |
| $^{121}\text{Te}$         | 154           | 212 [81]                                                |
| $^{233}\text{Pa}$         | 26.97         | 312 [38.6]                                              |
| $^{124}\text{Sb}$         | 60.2          | 602.7 [98.3] / 1690 [47.8]                              |

<https://doi.org/10.1371/journal.pone.0190308.t001>

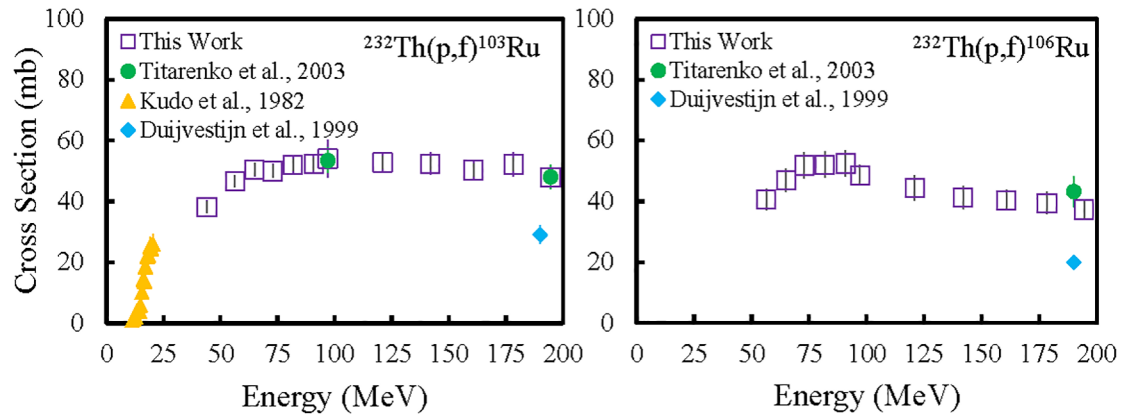

**Fig 1. Measured excitation functions for the formation of <sup>103</sup>Ru (left) and <sup>106</sup>Ru (right) for proton energies less than 200 MeV [20–22].**

<https://doi.org/10.1371/journal.pone.0190308.g001>

then passed through a column containing 1 mL DGA (N,N,N',N'-tetra-n-octyldiglycolamide) equilibrated with 10 M HCl. The eluent was collected (fraction 16) and the column was washed with an additional 20 mL 10 M HCl (fraction 17). All separation experiments were performed in triplicate.

## Results and discussion

### Cross section measurements

Measured excitation functions of <sup>103</sup>Ru, and <sup>106</sup>Ru are plotted in Fig 1 along with literature data [20–22]. The cross sections obtained in this work and the corresponding uncertainties are listed in Table 2. The cross sections reported in this work are similar to those measured by Titarenko et al. [21] and Kudo et al. [20] and slightly higher than those measured by Duijvestijn et al. [22]. In addition to proton induced fission, neutron induced fission does occur and may have an impact on the data. The effect of neutron induced fission is understood to be small, as the secondary neutron fluence is smaller than that of the primary beam by several orders of magnitude. Because secondary neutrons' angular distribution is forward-directed,

**Table 2. Measured excitation functions for the <sup>232</sup>Th(p,f)<sup>103</sup>Ru and <sup>232</sup>Th(p,f)<sup>106</sup>Ru reactions.**

| Nominal energy (MeV) | <sup>232</sup> Th(p,f) <sup>103</sup> Ru (mb) | Uncertainty (mb) | <sup>232</sup> Th(p,f) <sup>106</sup> Ru (mb) | Uncertainty (mb) |
|----------------------|-----------------------------------------------|------------------|-----------------------------------------------|------------------|
| 194.5                | 48                                            | 4                | 37                                            | 3                |
| 178.3                | 52                                            | 4                | 39                                            | 4                |
| 160.7                | 50                                            | 3                | 40                                            | 3                |
| 141.8                | 52                                            | 4                | 41                                            | 4                |
| 120.9                | 53                                            | 3                | 44                                            | 4                |
| 97                   | 54                                            | 6                | 48                                            | 3                |
| 90.8                 | 52                                            | 3                | 52                                            | 4                |
| 81.7                 | 52                                            | 3                | 52                                            | 4                |
| 72.8                 | 50                                            | 2                | 52                                            | 4                |
| 64.9                 | 50                                            | 2                | 47                                            | 4                |
| 56.3                 | 47                                            | 2                | 41                                            | 3                |
| 44                   | 38                                            | 2                |                                               |                  |

<https://doi.org/10.1371/journal.pone.0190308.t002>

their effect increases towards the “rear”, or lower energy, portion of a target foil stack. Details of these measurements have been extensively discussed previously [15, 17, 23, 24].

### Separation of $^{103}\text{Ru}$

The cationic species such as  $^{225}\text{Ac}$ , Ra, Ba, lanthanides and bulk thorium along with the majority of  $^{95}\text{Zr}$  passed through the anion column in the loading fraction and 10 mL 10 M HCl wash (fractions 1–3). Ruthenium is most strongly retained on the anion exchange resin using 1 M HCl [25], while several other fission products are not retained. Therefore the column was washed with an additional 20 mL of 1 M HCl (fractions 4–7), resulting in the removal of the majority of the  $^{95}\text{Nb}$  and  $^{123\text{m}}\text{Te}$  along with approximately 45% of the Pa. The loading and washing of the column resulted in  $^{103}\text{Ru}$  losses of 8–15%. Thirty milliliters of 10 M  $\text{HNO}_3$  resulted in the elution of  $85 \pm 5\%$  of  $^{103}\text{Ru}$  with a radiochemical purity of 82%. The main impurities present in this fraction consisted of  $^{117\text{m}}\text{Sn}$  and  $^{125,126}\text{Sb}$  with trace amounts of  $^{230,233}\text{Pa}$ ,  $^{95}\text{Nb}$ , and  $^{95}\text{Zr}$ . Fig 2 shows the elution of Nb, Zr, Te, Sn, Sb, Pa and Ru from the anion column.

According to a paper published by Pourmand et al. [26], Nb, Zr, Sn and Sb are strongly retained on DGA resin in high concentrations of HCl. Ruthenium, however is not strongly retained on DGA resin or in TODGA extraction systems with HCl or  $\text{HNO}_3$  solutions and several papers discuss fission product behavior in these systems [14, 27–32]. Therefore a DGA column was employed to remove these contaminants. The average recovery of  $^{103}\text{Ru}$  from the DGA column was  $98 \pm 1\%$  resulting in a final  $^{103}\text{Ru}$  recovery of  $83 \pm 5\%$  with a radiochemical purity of  $> 99.9\%$ . Ruthenium speciation is a complicated subject with respect to its separation in acid based systems and is likely responsible for the high variability in the loss of  $^{103}\text{Ru}$  from the anion column (8–15%) [33]. Ideally, pretreatment of the solution to obtain one species of ruthenium would be advantageous for consistent recoveries, however pretreatment is not

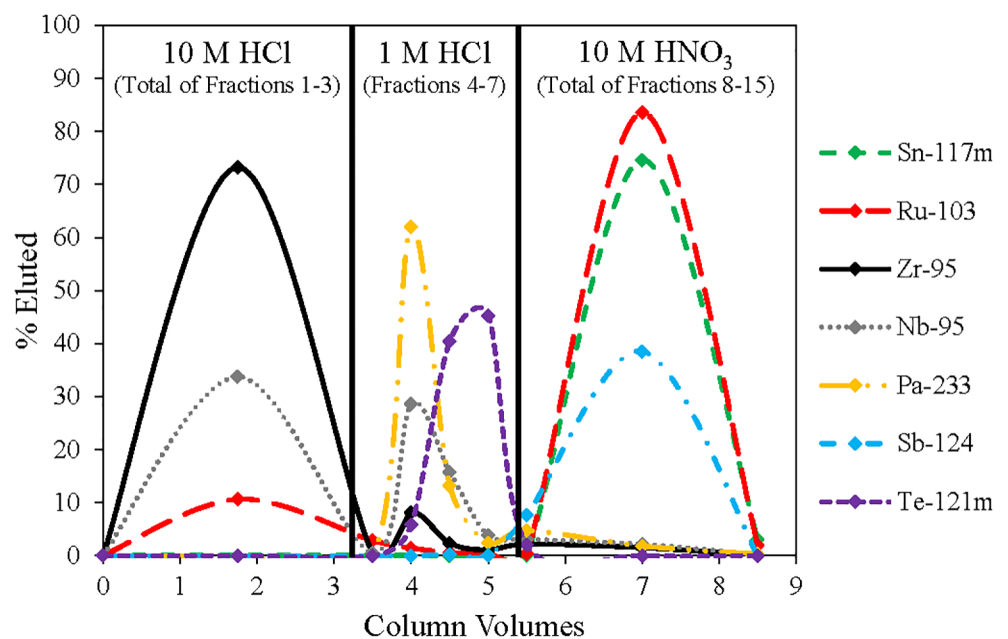

**Fig 2. Elution profile of Sn, Pa, Ru, Sb, Zr, Nb, and Te on the anion exchange column.** Fractions 1–3 are combined into one 10 M HCl fraction and fractions 8–15 are combined into one 10 M  $\text{HNO}_3$  fraction.

<https://doi.org/10.1371/journal.pone.0190308.g002>

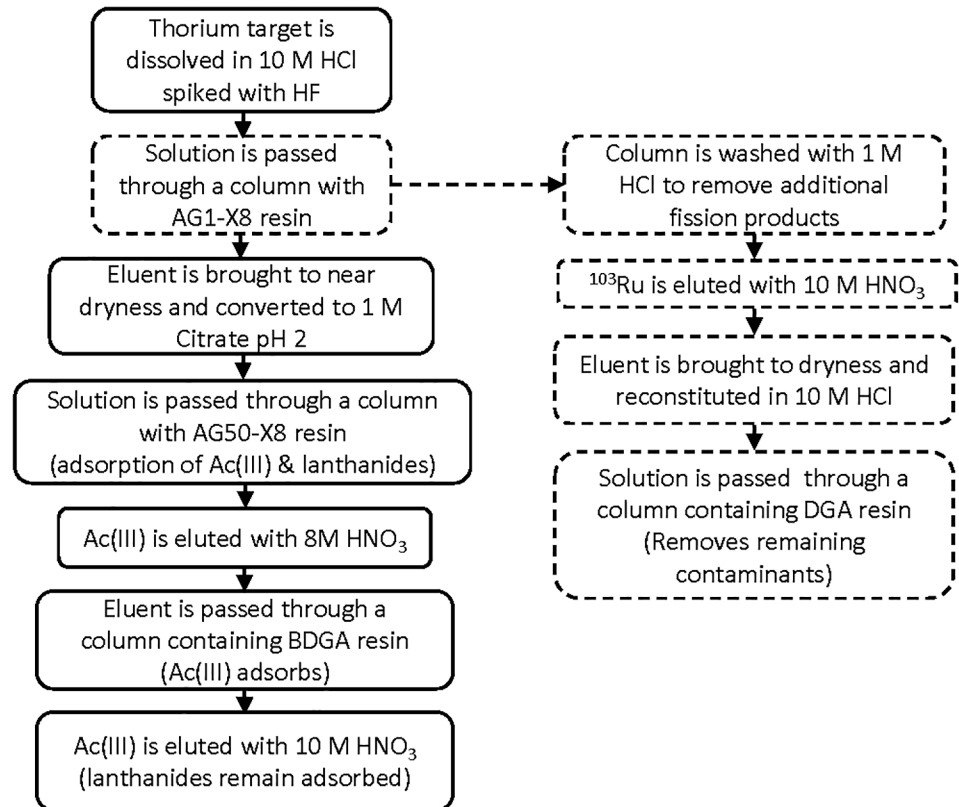

**Fig 3. Separation schematic showing separation of  $^{103}\text{Ru}$  (dashed lines) in tandem with  $^{225}\text{Ac}$  separation (solid lines) [13,14].**

<https://doi.org/10.1371/journal.pone.0190308.g003>

possible in this case as the isolation of  $^{103}\text{Ru}$  is an ancillary activity with respect to  $^{225}\text{Ac}$  recovery. A flow diagram of the whole process is shown in Fig 3.

As both  $^{117\text{m}}\text{Sn}$  and  $^{123\text{m}}\text{Te}$  have the same identifying  $\gamma$ -ray lines without a viable secondary gamma, a spike of  $^{121\text{m}}\text{Te}$  was added to the sample to help deconvolute the separation of  $^{123\text{m}}\text{Te}$  and  $^{117\text{m}}\text{Sn}$ . This information led to the determination that  $^{123\text{m}}\text{Te}$  was present in the 1 M HCl fractions and  $^{117\text{m}}\text{Sn}$  was present in the 10 M  $\text{HNO}_3$  fractions. This elemental distribution is further corroborated by prior reports that tellurium is eluted from anion columns in 1 M HCl while tin is retained strongly, and that tin elutes with  $^{103}\text{Ru}$  in 10 M  $\text{HNO}_3$  [34, 35].

Ruthenium-103 obtained from this method contains the isotopic impurity  $^{106}\text{Ru}$ . However as  $^{106}\text{Ru}$  decays to  $^{106\text{g}}\text{Rh}$  (29.9 s),  $^{103\text{m}}\text{Rh}$  obtained from a generator would be isotopically pure five minutes after elution. The predicted experimental yield calculated from measured cross sections of  $^{103}\text{Ru}$ , with anticipated full scale  $^{225}\text{Ac}$  production, is (~ 3 Ci (111 GBq)) at end of bombardment. This would significantly increase the current supply of  $^{103}\text{Ru}$  for medical research needs.

Future work needs to be performed in order to determine suitable conditions for a  $^{103}\text{Ru}/^{103\text{m}}\text{Rh}$  generator system. Solvent extraction generators have been designed employing a carbon tetrachloride extraction, however given the toxicity associated with  $\text{CCl}_4$  this method is not amenable for biomedical applications [6, 36]. A successful generator would employ a solid support that allows repeated elution of  $^{103\text{m}}\text{Rh}$  with minimal breakthrough of  $^{103}\text{Ru}$ . This would preferably entail the use of mineral acids that can be readily removed from the product such as HCl or  $\text{HNO}_3$ .

## Conclusions

A method was obtained for the recovery and purification of  $^{103}\text{Ru}$  that is produced concurrently with  $^{225}\text{Ac}$ . This method results in a final  $^{103}\text{Ru}$  chemical recovery yield of  $83 \pm 5\%$  with a radiochemical purity of  $> 99.9\%$ . The measurement of energy dependent cross sections for the proton induced fission production of  $^{103}\text{Ru}$  and  $^{106}\text{Ru}$  at proton energies less than 200 MeV on  $^{232}\text{Th}$  targets predict thick target yields of  $\sim 111$  GBq. This process can be implemented with the existing  $^{225}\text{Ac}$  recovery flow sheet at minimal impact to the  $^{225}\text{Ac}$  process. Additionally, future work to develop a robust  $^{103}\text{Ru}/^{103\text{m}}\text{Rh}$  radionuclide generator is essential to the success of  $^{103\text{m}}\text{Rh}$  for auger therapy.

## Acknowledgments

We gratefully recognize the United States Department of Energy, Office of Science, Isotope Development and Production for Research and Application subprogram within Office of Nuclear Physics and the LANL LDRD program (LDRD 20160439ER) for financial support.

## Author Contributions

**Conceptualization:** Tara Mastren, Valery Radchenko, Michael Ernst-Heinrich Fassbender.

**Data curation:** Jonathan W. Engle, John W. Weidner, F. Meiring Nortier.

**Funding acquisition:** Valery Radchenko, Kevin D. John, Michael Ernst-Heinrich Fassbender.

**Investigation:** Tara Mastren, Philip D. Hopkins, Michael Ernst-Heinrich Fassbender.

**Methodology:** Tara Mastren, Valery Radchenko, Michael Ernst-Heinrich Fassbender.

**Resources:** Roy Copping.

**Supervision:** Tara Mastren, Michael Ernst-Heinrich Fassbender.

**Validation:** Tara Mastren, Roy Copping, Michael Ernst-Heinrich Fassbender.

**Writing – original draft:** Tara Mastren.

**Writing – review & editing:** Tara Mastren, Valery Radchenko, Jonathan W. Engle, Roy Copping, Mark Brugh, Eva R. Birnbaum, Kevin D. John, Michael Ernst-Heinrich Fassbender.

## References

1. Zweit J. Radionuclides and carrier molecules for therapy. *Physics in Medicine and Biology*. 1996; 41(10):1905–14. <https://doi.org/10.1088/0031-9155/41/10/004> PMID: 8912370
2. Bernhardt P, Forssell-Aronsson E, Jacobsson L, Skarnemark G. Low-energy electron emitters for targeted radiotherapy of small tumours. *Acta Oncol*. 2001; 40(5):602–8. PMID: 11669332
3. Thisgaard H, Halle B, Aaberg-Jessen C, Olsen BB, Therkelsen ASN, Dam JH, et al. Highly Effective Auger-Electron Therapy in an Orthotopic Glioblastoma Xenograft Model using Convection-Enhanced Delivery. *Theranostics*. 2016; 6(12):2278–91. <https://doi.org/10.7150/thno.15898> PMID: 27924163
4. Pereira E, do Quental L, Palma E, Oliveira MC, Mendes F, Raposinho P, et al. Evaluation of Acridine Orange Derivatives as DNA-Targeted Radiopharmaceuticals for Auger Therapy: Influence of the Radionuclide and Distance to DNA. *Sci Rep-Uk*. 2017; 7. <https://doi.org/10.1038/srep42544> PMID: 28211920
5. Cornelissen B, Vallis KA. Targeting the nucleus: an overview of Auger-electron radionuclide therapy. *Curr Drug Discov Technol*. 2010; 7(4):263–79. PMID: 21034408.
6. Bartos B, Kowalska E, Bilewicz A, Skarnemark G.  $^{103}\text{Ru}/^{103\text{m}}\text{Rh}$  generator. *J Radioanal Nucl Ch*. 2009; 279(2):655–7. <https://doi.org/10.1007/s10967-008-7346-9>
7. Skarnemark G, Odegaard-Jensen A, Nilsson J, Bartos B, Kowalska E, Bilewicz A, et al. Production of  $^{103\text{m}}\text{Rh}$  for cancer therapy. *J Radioanal Nucl Ch*. 2009; 280(2):371–3. <https://doi.org/10.1007/s10967-009-0529-1>



8. van Rooyen J, Szucs Z, Zeevaart JR. A possible in vivo generator Pd-103/Rh-103m-recoil considerations. *Appl Radiat Isotopes*. 2008; 66(10):1346–9. <https://doi.org/10.1016/j.apradiso.2008.02.088> PMID: 18434172
9. Knapp FF, Dash A. *Radionuclide Generator Systems Represent Convenient Production Systems to Provide Therapeutic Radionuclides*. Radiopharmaceuticals for Therapy. New Delhi: Springer India; 2016. p. 131–57.
10. Hermanne A, Sonck M, Fenyvesi A, Daraban L. Study on production of Pd-103 and characterisation of possible contaminants in the proton irradiation of Rh-103 up to 28 MeV. *Nucl Instrum Meth B*. 2000; 170(3–4):281–92. [https://doi.org/10.1016/S0168-583x\(00\)00190-7](https://doi.org/10.1016/S0168-583x(00)00190-7)
11. Hermanne A, Sonck M, Takacs S, Tarkanyi F, Shubin Y. Study on alternative production of Pd-103 and characterisation of contaminants in the deuteron irradiation of Rh-103 up to 21 MeV. *Nucl Instrum Meth B*. 2002; 187(1):3–14. [https://doi.org/10.1016/S0168-583x\(01\)00851-5](https://doi.org/10.1016/S0168-583x(01)00851-5)
12. Sudar S, Cserpak F, Qaim SM. Measurements and nuclear model calculations on proton-induced reactions on Rh-103 up to 40 MeV: evaluation of the excitation function of the Rh-103(p,n) Pd-103 reaction relevant to the production of the therapeutic radionuclide Pd-103. *Appl Radiat Isotopes*. 2002; 56(6): 821–31. [https://doi.org/10.1016/S0969-8043\(02\)00054-4](https://doi.org/10.1016/S0969-8043(02)00054-4)
13. Radchenko V, Engle JW, Wilson JJ, Maassen JR, Nortier FM, Taylor WA, et al. Application of ion exchange and extraction chromatography to the separation of actinium from proton-irradiated thorium metal for analytical purposes. *J Chromatogr A*. 2015; 1380:55–63. <https://doi.org/10.1016/j.chroma.2014.12.045> PMID: 25596759
14. Radchenko V, Mastren T, Meyer CAL, Ivanov AS, Bryantsev VS, Copping R, et al. Radiometric evaluation of diglycolamide resins for the chromatographic separation of actinium from fission product lanthanides. *Talanta*. 2017; 175:318–24. <http://dx.doi.org/10.1016/j.talanta.2017.07.057>. PMID: 28841997
15. Weidner JW, Mashnik SG, John KD, Hemez F, Ballard B, Bach H, et al. Proton-induced cross sections relevant to production of Ac-225 and Ra-223 in natural thorium targets below 200 MeV. *Appl Radiat Isotopes*. 2012; 70(11):2602–7. <https://doi.org/10.1016/j.apradiso.2012.07.006> PMID: 22940414
16. Steyn GF, Mills SJ, Nortier FM, Simpson BRS, Meyer BR. Production of Fe-52 Via Proton-Induced Reactions on Manganese and Nickel. *Appl Radiat Isotopes*. 1990; 41(3):315–25.
17. Weidner JW, Mashnik SG, John KD, Ballard B, Birnbaum ER, Bitteker LJ, et al. Ac-225 and Ra-223 production via 800 MeV proton irradiation of natural thorium targets. *Appl Radiat Isotopes*. 2012; 70(11): 2590–5. <https://doi.org/10.1016/j.apradiso.2012.07.003> PMID: 22944532
18. Ballard B, Wycoff D, Birnbaum ER, John KD, Lenz JW, Jurisson SS, et al. Selenium-72 formation via Br-nat(p,x) induced by 100 MeV Protons: Steps towards a novel Se-72/As-72 generator system. *Appl Radiat Isotopes*. 2012; 70(4):595–601. <https://doi.org/10.1016/j.apradiso.2012.01.018> PMID: 22326368
19. Nortier FM, Hong B. The isotope production facility at TA-53. Los Alamos National Laboratory, 2010.
20. Kudo H, Muramatsu H, Nakahara H, Miyano K, Kohno I. Fission Fragment Yields in the Fission of Th-232 by Protons of Energies 8 to 22 MeV. *Phys Rev C*. 1982; 25(6):3011–23. <https://doi.org/10.1103/PhysRevC.25.3011>
21. Titarenko YE, Batyaev VF, Karpikhin EI, Mulambetov RD, Koldobsky AB, Zhivun VM, et al. Experimental and Theoretical Study of the Yields of Residual Product Nuclei Produced in Thin Targets Irradiated by 100–2600 MeV Protons. Vienna, Austria: International Atomic Energy Agency, 2003.
22. Duijvestijn MC, Koning AJ, Beijers JPM, Ferrari A, Gastal M, van Klinken J, et al. Proton-induced fission at 190 MeV of W-nat, Au-197, Pb-nat, Pb-208, and Th-232. *Phys Rev C*. 1999; 59(2):776–88. <https://doi.org/10.1103/PhysRevC.59.776>
23. Engle JW, Mashnik SG, Weidner JW, Wolfsberg LE, Fassbender ME, Jackman K, et al. Cross sections from proton irradiation of thorium at 800 MeV. *Phys Rev C*. 2013; 88(1). <https://doi.org/10.1103/PhysRevC.88.014604>
24. Engle JW, Weidner JW, Ballard BD, Fassbender ME, Hudston LA, Jackman KR, et al. Ac, La, and Ce radioimpurities in Ac-225 produced in 40–200 MeV proton irradiations of thorium. *Radiochim Acta*. 2014; 102(7):569–81. <https://doi.org/10.1515/ract-2013-2179>
25. Bunney LR, Ballou NE, Pascual J, Foti S. Quantitative Radiochemical Analysis by Ion Exchange Anion Exchange Behavior of Several Metal Ions in Hydrochloric, Nitric, and Sulfuric Acid Solutions. *Anal Chem*. 1959; 31(3):324–6. <https://doi.org/10.1021/ac60147a001>
26. Pourmand A, Dauphas N. Distribution coefficients of 60 elements on TODGA resin: Application to Ca, Lu, Hf, U and Th isotope geochemistry. *Talanta*. 2010; 81(3):741–53. <https://doi.org/10.1016/j.talanta.2010.01.008> PMID: 20298848
27. Zhang A, Wei Y, Hoshi H, Kumagai M. Chromatographic Separation of Strontium (II) from a Nitric Acid Solution Containing some Typically Simulated Elements by a Novel Silica-Based TODGA Impregnated

- Polymeric Composite in the MAREC Process. *Solvent Extraction and Ion Exchange*. 2005; 23(2): 231–47. <https://doi.org/10.1081/SEI-200049894>
28. Modolo G, Asp H, Vijgen H, Malmbeck R, Magnusson D, Sorel C. Demonstration of a TODGA-Based Continuous Counter-Current Extraction Process for the Partitioning of Actinides from a Simulated PUREX Raffinate, Part II: Centrifugal Contactor Runs. *Solvent Extraction and Ion Exchange*. 2008; 26(1):62–76. <https://doi.org/10.1080/07366290701784175>
  29. Magnusson D, Christiansen B, Glatz JP, Malmbeck R, Modolo G, Serrano-Purroy D, et al. Demonstration of a TODGA based Extraction Process for the Partitioning of Minor Actinides from a PUREX Raffinate. *Solvent Extraction and Ion Exchange*. 2009; 27(1):26–35. <https://doi.org/10.1080/07366290802544726>
  30. Mastren T, Radchenko V, Owens A, Copping R, Boll R, Griswold JR, et al. Simultaneous Separation of Actinium and Radium Isotopes from a Proton Irradiated Thorium Matrix. *Sci Rep-Uk*. 2017; 7:8216. <https://doi.org/10.1038/s41598-017-08506-9> PMID: 28811573
  31. Mastren T, Radchenko V, Engle JW, Weidner JW, Owens A, Wyant LE, et al. Chromatographic separation of the theranostic radionuclide (<sup>111</sup>Ag) from a proton irradiated thorium matrix. *Anal Chim Acta*. 2018; 998:75–82. <https://doi.org/10.1016/j.aca.2017.10.020> PMID: 29153089
  32. Filosofov DV, Rakhimov AV, Bozhikov GA, Karaivanov DV, Lebedev NA, Norseev YV, et al. Isolation of radionuclides from thorium targets irradiated with 300-MeV protons. *Radiochemistry*. 2013; 55(4): 410–7. <https://doi.org/10.1134/s1066362213040127>
  33. *The Radiochemistry of Ruthenium*. Washington, DC: The National Academies Press; 1961. 90 p.
  34. Ichikawa F, Uruno S, Imai H. Distribution of Various Elements between Nitric Acid and Anion Exchange Resin. *B Chem Soc Jpn*. 1961; 34(7):952–5. <https://doi.org/10.1246/bcsj.34.952>
  35. Guin R, Das SK, Saha SK. The anion exchange behavior of Te and Sb. *J Radioanal Nucl Ch*. 1998; 230(1–2):269–71. <https://doi.org/10.1007/Bf02387477>
  36. Epperson CE, Landolt RR, Kessler WV. Solvent-Solvent Extraction of Rh-103m from Ru-103 Employing a Sulfate Carbon Tetrachloride Medium. *Anal Chem*. 1976; 48(7):979–81. <https://doi.org/10.1021/ac60371a031>
